# Supplementary material
Source: publisher site journal article supplement (https://www.dovepress.com/article/supplementary_file/550066/550066%2525252520Supplementary%2525252520Material.docx)
Supplement: Supplementary file 1 [file 550066%2525252520Supplementary%2525252520Material.docx]

**Supplementary Table S1. Database-specific search strategies and last run date (September 30, 2025, JST)**

| Database | Search string (verbatim) | Date last run | Notes |
| --- | --- | --- | --- |
| PubMed/MEDLINE | ( "Pulmonary Disease, Chronic Obstructive"[Mesh] OR COPD[tiab] OR "chronic obstructive pulmonary disease"[tiab] OR emphysema[tiab] ) AND (  "maximal inspiratory pressure"[tiab] OR MIP[tiab] OR  "maximal expiratory pressure"[tiab] OR MEP[tiab] OR  "sniff nasal inspiratory pressure"[tiab] OR SNIP[tiab] OR  "peak inspiratory flow rate"[tiab] OR PIFR[tiab] OR  "peak expiratory flow rate"[tiab] OR PEFR[tiab] OR  "cough peak flow"[tiab] OR CPF[tiab] ) AND (  mortality[tiab] OR survival[tiab] OR prognosis[tiab] OR "end of life"[tiab] OR  "overall mortality"[tiab] OR "hazard ratio"[tiab] OR "12 month"[tiab] OR "12-month"[tiab] OR  "1 year"[tiab] OR "one-year"[tiab] OR "long-term"[tiab] OR "long term"[tiab] ) NOT (animals[MeSH] NOT humans[MeSH]) AND ("1900/01/01"[Date - Publication] : "2025/09/30"[Date - Publication]) | September 30, 2025 (JST) | Humans filter via NOT animal-only; no device-brand filter. |
| Cochrane Library—CENTRAL | ([mh "Pulmonary Disease, Chronic Obstructive"] OR COPD:ti,ab,kw OR "chronic obstructive pulmonary disease":ti,ab,kw OR emphysema:ti,ab,kw) AND (  [mh "Respiratory Muscles"] OR [mh "Muscle Strength"] OR  "maximal inspiratory pressure":ti,ab,kw OR MIP:ti,ab,kw OR  "maximal expiratory pressure":ti,ab,kw OR MEP:ti,ab,kw OR  "sniff nasal inspiratory pressure":ti,ab,kw OR SNIP:ti,ab,kw OR  "peak inspiratory flow rate":ti,ab,kw OR PIFR:ti,ab,kw OR  "peak expiratory flow rate":ti,ab,kw OR PEFR:ti,ab,kw OR  "cough peak flow":ti,ab,kw OR CPF:ti,ab,kw ) AND (  mortality:ti,ab,kw OR survival:ti,ab,kw OR prognosis:ti,ab,kw OR "end of life":ti,ab,kw OR  "overall mortality":ti,ab,kw OR "hazard ratio":ti,ab,kw OR "12 month":ti,ab,kw OR "12-month":ti,ab,kw OR  "1 year":ti,ab,kw OR "one-year":ti,ab,kw OR "long-term":ti,ab,kw OR "long term":ti,ab,kw ) | September 30, 2025 (JST) | Field tags [mh], :ti,ab,kw. |
| Web of Science Core Collection | TS=(  (COPD OR "chronic obstructive pulmonary disease" OR emphysema)  AND (  "maximal inspiratory pressure" OR MIP OR  "maximal expiratory pressure" OR MEP OR  "sniff nasal inspiratory pressure" OR SNIP OR  "peak inspiratory flow rate" OR PIFR OR  "peak expiratory flow rate" OR PEFR OR  "cough peak flow" OR CPF  )  AND (  mortality OR survival OR prognosis OR "end of life" OR "overall mortality" OR "hazard ratio" OR  "12 month" OR "12-month" OR "1 year" OR "one-year" OR "long-term" OR "long term"  ) ) Timespan=1900-2025; Indexes=SCI-EXPANDED, SSCI, ESCI; Language=(English OR Japanese) | September 30, 2025 (JST) | TS=Title/Abstract/Keywords. Timespan 1900–2025. |

Abbreviations: CENTRAL, Cochrane Central Register of Controlled Trials; JST, Japan Standard Time; MeSH, Medical Subject Headings; PRISMA, Preferred Reporting Items for Systematic Reviews and Meta-Analyses; tiab, title/abstract field; kw, keyword field; TS, Topic (title/abstract/keywords) field (Web of Science).

**Supplementary Table S2. Study characteristics and effect estimates**

| Author_ (year) | Country | Design | N | Age | Male | % pred. FEV1 | GOLD 1/2/3/4 | Smoking status | BMI | Sarcopenia | ICS | 6MWD | mMRC | Protocol details |
| --- | --- | --- | --- | --- | --- | --- | --- | --- | --- | --- | --- | --- | --- | --- |
| Gray-Donald_1996 | Canada | Prospective cohort; single center | 184 | 63.1±7.7 | 72.3% | 27.6±9.1 | NR | Current smoker: 80 (23.1%) | 24.0±4.8 | NR | NR | NR | NR | Maximal inspiratory (Plmax) and expiratory (PEmax) mouth pressures at FRC and a volume close to total lung capacity, respectively. Three measurements were recorded, and the highest value was used in the analysis. |
| Xu_2019 | China | Prospective cohort; single center | 326 | Survival 63.1±7.7, non-Survival 71.8±9.3 | 80.1% | Survival:54.9±19.3, non-Survival: 33.7±13.1 | NR | Pack-years  Survival:24.7±28.9, non-survival:24.4±22.9 | Survival:22.3±3.8, non-survival: 21.4±3.6 | FFMI (kg/m2)  Survival:16.5±2.3, non-survival:14.3±2.0 | NR | Survival:436.7±105.3m, non-survival327.0±127.7m | Survival: 1.5±1.0, non-survival:3.0±1.2 | Quality control was conducted according to the ATS and the European Respiratory Society protocols, and the maximum value out of three measurements was selected. |
| Benzo_2013 | USA | NETT secondary analysis; multicenter, repeated measures | 1218 | 66.1±6.1 | 61.0% | 26.8 (SD:NR) | NR | NR | NR | NR | NR | Mean: 371.1m | Mean: 3.2 | NR |
| Moore_2010 | UK | Prospective cohort; single center | 110 | 62.8±9.4 | 66.4% | 33.6±18.2 | 2/21/37/50 | NR | 25.1±6.3 | NR | NR | NR | NR | Catheter-in-bung (dental putty) occluding one nostril → transducer; contralateral nostril for sniffs; multiple attempts; pressure in obstructed nostril ≈ nasopharyngeal (surrogate of alveolar) pressure. |
| Nizet_2005 | Netherlands | Prospective cohort; hypercapnic COPD subset | 47 | 66.3±6.7 | 59.6% | 32.4±14.1 | NR | Current smoker: 14 (29.8%) | 25.6± 5.5 | NR | 31 (66.0%) | NR | NR | NR |
| Silva_2024 | Brazil | Prospective cohort; single center | 79 | 66.2±8.7 | 65.8% | 35.2 (26.3-40.3) | 1/6/37/35 | NR | 24.1±1.6 | NR | 79 (100.0%) | 398.8±107.5m | NR |  |

6MWD, 6-minute walk distance; BMI, body mass index; CI, confidence interval; COPD, chronic obstructive pulmonary disease; FFMI, fat-free mass index; FEV₁ %pred, forced expiratory volume in 1 s, percent predicted; GOLD, Global Initiative for Chronic Obstructive Lung Disease; HR, hazard ratio; ICS, inhaled corticosteroid; IQR, interquartile range; mMRC, modified Medical Research Council dyspnea scale; NETT, National Emphysema Treatment Trial; NR, not reported; OR, odds ratio.

Notes: Unless otherwise specified, the outcome refers to all-cause mortality. Continuous variables are reported as mean±SD; where medians are presented, values are shown as median (IQR). Percentages are calculated from each study's total sample (N) unless otherwise stated. FEV₁ is presented as % predicted according to each study's reference equations. GOLD stages are listed in the order 1/2/3/4. Smoking status follows the source definition of "current smoker"; cumulative exposure is presented as pack-years. FFMI is expressed in kg/m²; 6MWD in metres (m). ICS use denotes receipt of an inhaled corticosteroid at baseline. Items unavailable in the source are denoted as NR. Where effect estimates were harmonized across reporting scales (e.g., per 10 units to per 1 unit), a log-linear relationship was assumed.
